# Supplementary material
Source: PubMed Central journal article supplement (PMC3947098)
Supplement: NIHMS537738-supplement-2.pdf [file NIHMS537738-supplement-2.pdf]

# ADVANCED MATERIALS

## Supporting Information

for *Adv. Mater.*, DOI: 10.1002/adma. 201303356

Triggered Sorting and Co-Assembly of Genetically  
Engineered Protein Microdomains in the Cytoplasm

*Pu Shi, Yi-An Lin, Martha Pastuszka, Honggang Cui, and J.  
Andrew MacKay\**

**Supporting Information****S1. Negative staining TEM imaging confirms that ELP monoblocks assemble large Genetically Engineered Protein Microdomains (GEPMs).**

Unlike the diblock ELP S48I48, which forms small uniform particles (Figure 1e), ELP monoblocks I24, V96 and V192 form large polydisperse objects when dried above their transition temperature, which can be imaged using negative staining TEM. The size and shape of these structures vary widely, which is consistent with their observation using confocal imaging (Figure 2).

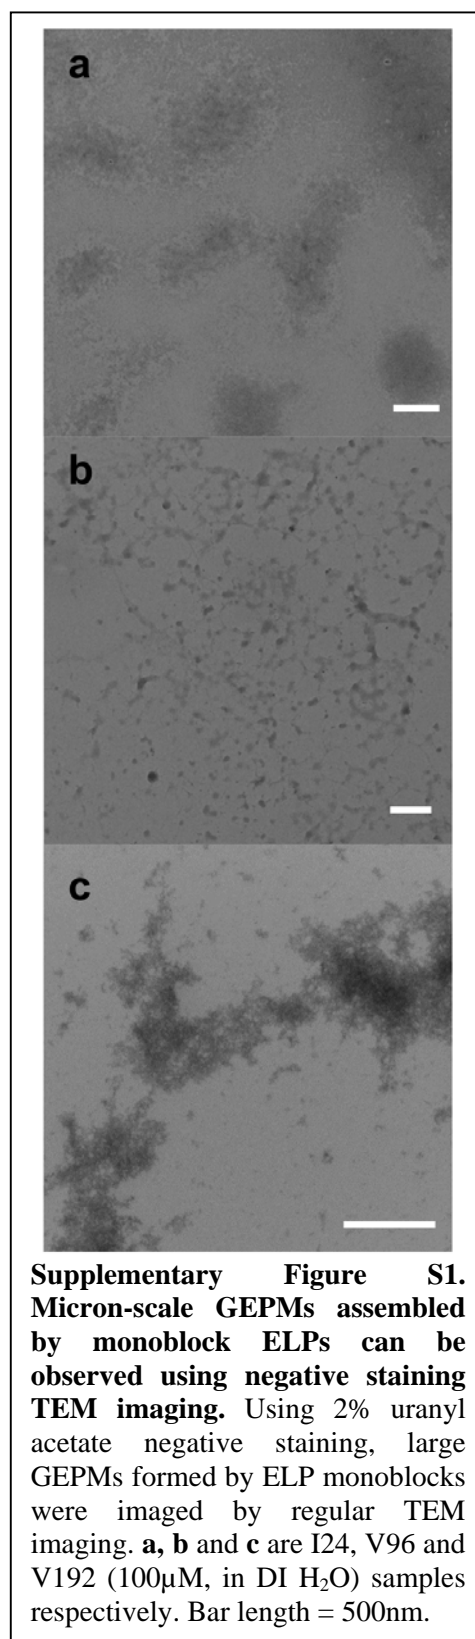

# ADVANCED MATERIALS

## S2. Rhodamine (Rho) and carboxyfluorescein (CF) labeled ELPs are uniformly dispersed below their transition temperature ( $T_t$ ) *in vitro*

When imaged *in vitro* below their common  $T_t$  (28 °C), ELP samples in all four groups were uniformly mixed and highly colocalized (Supplementary Figure S2); however, they did not form genetically engineered protein microdomains (GEPMs) until raised above this assembly temperature (Figure 2). The un-transitioned Rho and CF labeled ELP samples showed diffuse red and green fluorescence respectively.

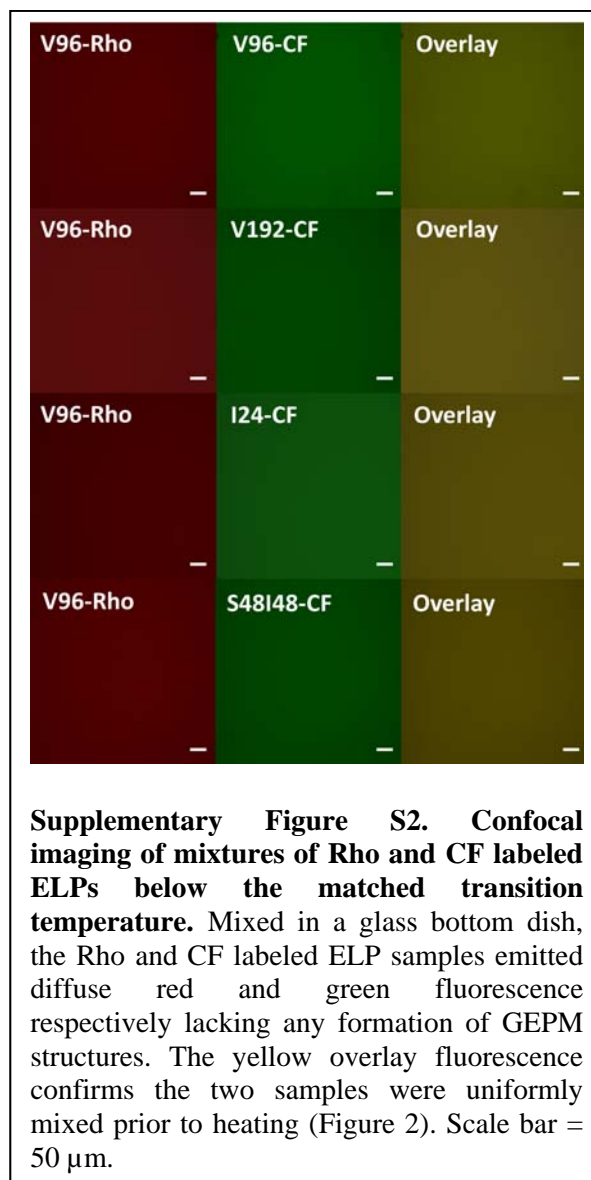

**Supplementary Figure S2. Confocal imaging of mixtures of Rho and CF labeled ELPs below the matched transition temperature.** Mixed in a glass bottom dish, the Rho and CF labeled ELP samples emitted diffuse red and green fluorescence respectively lacking any formation of GEPM structures. The yellow overlay fluorescence confirms the two samples were uniformly mixed prior to heating (Figure 2). Scale bar = 50  $\mu\text{m}$ .

**S3. Spatial sorting between GEPMs formed by monoblock and diblock ELPs is conserved over a range of mixing concentrations.**

Besides the ratio tested in Figure 2 (V96: S48I48 = 250  $\mu$ M: 25  $\mu$ M), two additional mixing ratios of monoblock and diblock ELPs (V96: S48I48 = 350  $\mu$ M : 25  $\mu$ M and 100  $\mu$ M : 25  $\mu$ M) were examined to discover whether *in vitro* self-sorting was concentration dependent. As shown in Supplementary Figure S3, the other two mixing ratios (top two rows) show similar spatial self-sorting of GEPMs. Different

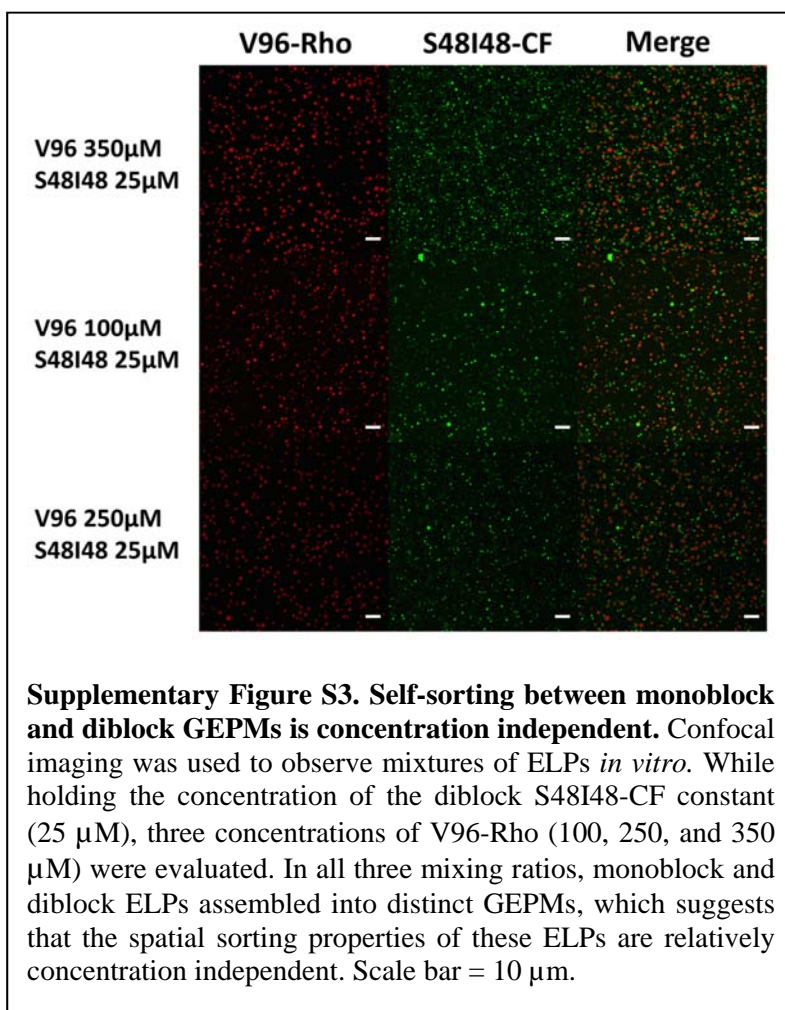

from the original mixing ratios that were selected to match the  $T_t$  (28  $^{\circ}$ C), in these two new mixing ratios the ELPs transition at slightly different temperatures. 250  $\mu$ M V96 and 25  $\mu$ M S48I48 both phase separate at 28  $^{\circ}$ C. Using the regression line for the correlation of concentration and  $T_t$ , the  $T_t$  of V96 at 350  $\mu$ M and 100  $\mu$ M are 27.7 and 29.7  $^{\circ}$ C respectively.
